# Supplementary material for: A gene expression map of host immune response in human brucellosis
Source: PubMed Central journal article supplement (PMC9376622; doi:10.3389/fimmu.2022.951232), 2022-08-01
Supplement: DataSheet_2.pdf [file DataSheet_2.pdf]

## Supplementary Material

**Supplementary Table 1.** Diagnostic laboratory findings at relapse and remission of patients with chronic relapsing brucellosis (24 males/1 female, mean age 60.6±6.9 years).

| #Patient | Blood culture |     | Wright's SAT<br>(positive ≥1:160) |     | Coombs' anti- <i>Brucella</i> SAT<br>(positive ≥1:320) |       | Complement<br>Fixation test<br>(positive ≥1:16) |     |
|----------|---------------|-----|-----------------------------------|-----|--------------------------------------------------------|-------|-------------------------------------------------|-----|
|          | Rel           | Rem | Rel                               | Rem | Rel                                                    | Rem   | Rel                                             | Rem |
| CRB1     | pos           | neg | 160                               | 160 | 640                                                    | 640   | 32                                              | 32  |
| CRB2     | neg           | neg | 320                               | 160 | >1280                                                  | 640   | 32                                              | 16  |
| CRB3     | pos           | neg | 160                               | 80  | 640                                                    | 320   | 64                                              | 16  |
| CRB4     | pos           | neg | 80                                | 80  | 320                                                    | 320   | 64                                              | 32  |
| CRB5     | neg           | neg | 320                               | 320 | >1280                                                  | >1280 | 256                                             | 64  |
| CRB6     | neg           | neg | 160                               | 160 | 640                                                    | 640   | 128                                             | 64  |
| CRB7     | pos           | neg | 160                               | 160 | 1280                                                   | 320   | 128                                             | 16  |
| CRB8     | neg           | neg | 320                               | 640 | >1280                                                  | >1280 | 32                                              | 16  |
| CRB9     | pos           | neg | 160                               | 160 | 640                                                    | 640   | 128                                             | 32  |
| CRB10    | neg           | neg | 160                               | 80  | 160                                                    | 160   | 64                                              | 16  |
| CRB11    | neg           | neg | 80                                | 160 | 1280                                                   | 640   | 128                                             | 32  |
| CRB12    | neg           | neg | 160                               | 80  | 320                                                    | 320   | 16                                              | 32  |
| CRB13    | pos           | neg | 80                                | 40  | 320                                                    | 160   | 256                                             | 32  |
| CRB14    | neg           | neg | 80                                | 160 | 320                                                    | 640   | 128                                             | 64  |
| CRB15    | neg           | neg | 640                               | 160 | >1280                                                  | 640   | 64                                              | 64  |
| CRB16    | neg           | neg | 320                               | 160 | 320                                                    | 160   | 128                                             | 64  |
| CRB17    | neg           | neg | 160                               | 80  | 640                                                    | 160   | 256                                             | 32  |
| CRB18    | neg           | neg | 320                               | 640 | >1280                                                  | >1280 | 32                                              | 16  |
| CRB19    | pos           | neg | 160                               | 160 | 640                                                    | 640   | 128                                             | 32  |
| CRB20    | neg           | neg | 160                               | 80  | 160                                                    | 160   | 64                                              | 16  |
| CRB21    | neg           | neg | 80                                | 160 | 1280                                                   | 640   | 128                                             | 32  |
| CRB22    | neg           | neg | 160                               | 80  | 320                                                    | 320   | 16                                              | 32  |
| CRB23    | neg           | neg | 80                                | 160 | 320                                                    | 640   | 128                                             | 64  |
| CRB24    | neg           | neg | 640                               | 160 | >1280                                                  | 640   | 64                                              | 64  |
| CRB25    | pos           | neg | 640                               | 320 | 1280                                                   | >1280 | >256                                            | 32  |

CRB; chronic relapsing brucellosis, rel; relapse, rem; remission, pos; positive, neg; negative SAT; serum agglutination test. Results of serological tests are expressed as reciprocal titers.

Control macrophages

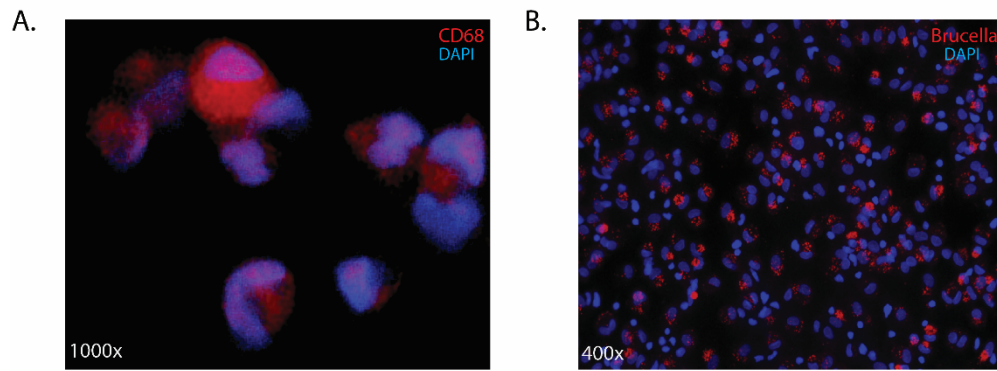

Control neutrophils

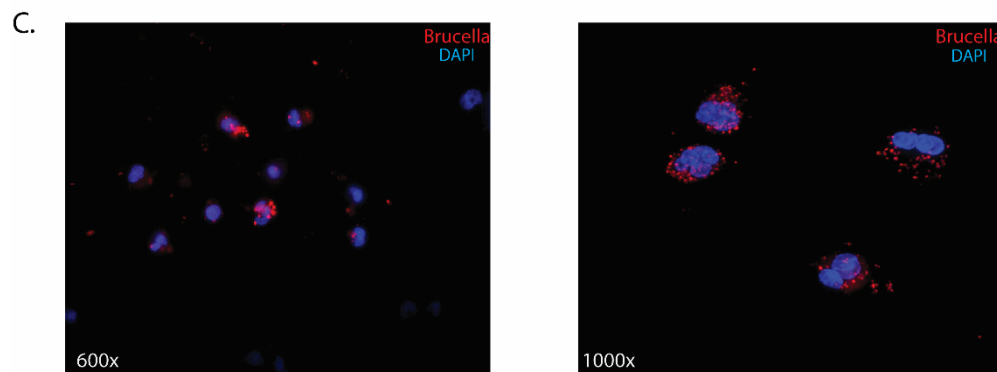

Untreated control neutrophils

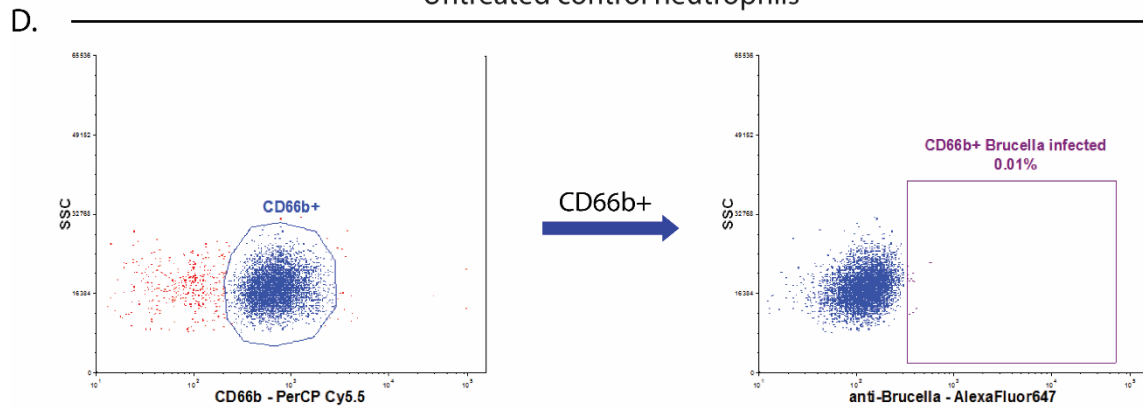

Brucella-treated control neutrophils

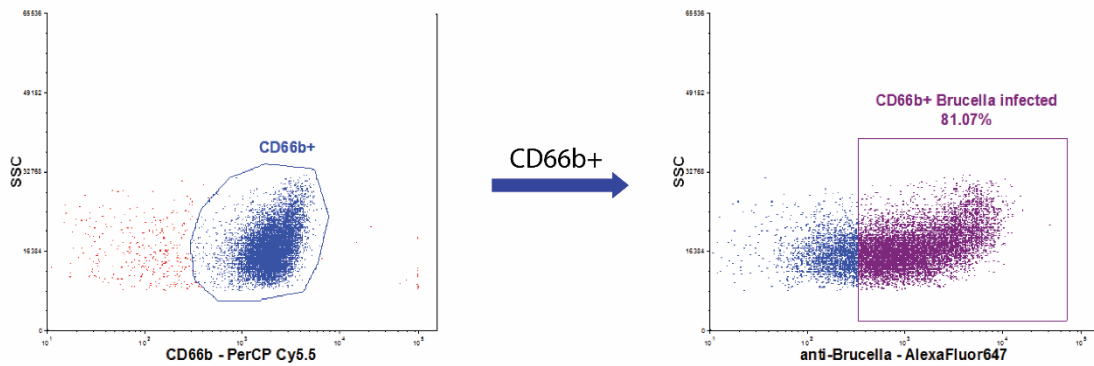

**Supplementary Figure 1. Differentiation status of human macrophages and phagocytosis of *Brucella* by human macrophages and neutrophils.** (A) Monocyte-to-macrophage differentiation was verified by immunofluorescence staining (Red: Mouse monoclonal anti-CD68, Blue: DAPI) using a fluorescence microscope, 100x lens. Macrophages and neutrophils from healthy donors (control) were treated *in vitro* with opsonized *Brucella* for 30 min, and phagocytosis was assessed by cell immunofluorescence (Red: Mouse monoclonal anti-*Brucella*, Blue: DAPI): (B) Control macrophages. Visualization was performed using a fluorescence microscope, 40x lens. (C) Control neutrophils. Left panel: Visualization was performed using a fluorescence microscope, 60 x lens. Right panel: Visualization was performed using a confocal microscope, 100 x lens. (D) Flow cytometric analysis in control neutrophils. CD66b positive cells were examined for the presence of *Brucella*, upon staining with a mouse monoclonal anti-*Brucella* antibody detected with a rabbit anti-mouse Alexa Fluor 647. Untreated neutrophils from a healthy donor (Untreated control neutrophils) were served as negative control. For (A)-(D), representative figures are shown.

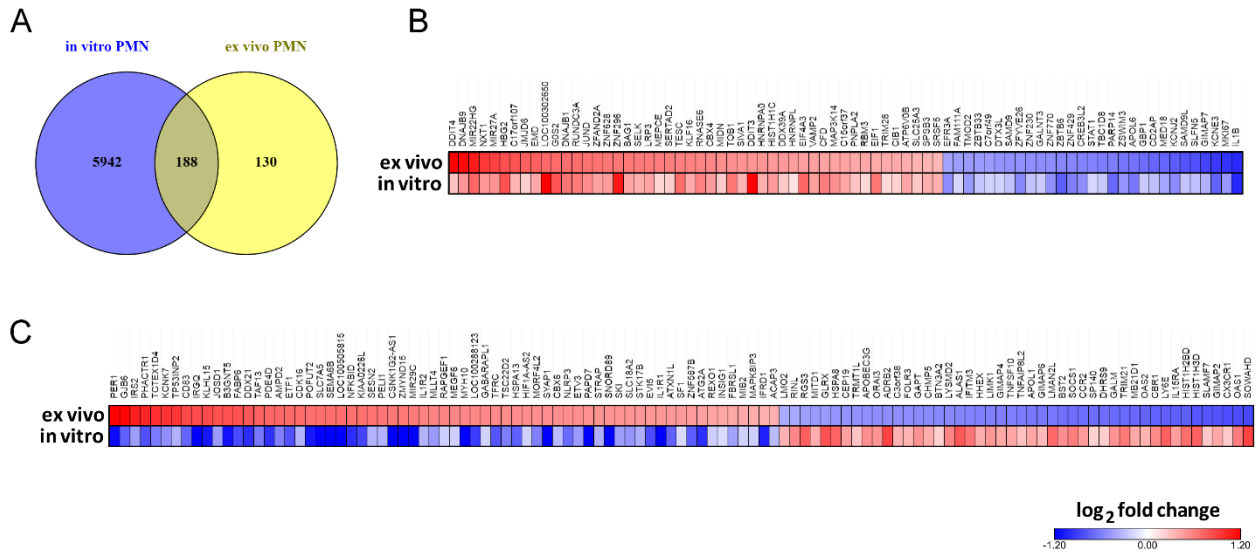

**Supplementary Figure 2. Comparison of transcriptomic profile of *in vitro* infected PMNs and PMNs from patients initially diagnosed with active brucellosis, after successful completion of their treatment.** (A) Venn diagram showing that 188 genes are commonly regulated between the two datasets. (B) and (C) Heatmaps showing the common differentially expressed genes (DEGs), characterized by similar (B, 77 DEGs) or opposite pattern of differential expression (C, 111 DEGs). FDR < 0.1 was used as threshold for both datasets.
